1 **Original Article**

2

3 **Self-interference and female advantage in chestnut**

4

5 Clément Larue<sup>a,b,\*</sup>, Rémy J. Petit<sup>a</sup>

6

7 <sup>a</sup>Univ. Bordeaux, INRAE, BIOGECO, 33610 Cestas, France

8 <sup>b</sup>INVENIO, Maison Jeannette, 24140 Douville, France

9

10 **\*Corresponding author**

11 Clément Larue, INRAE, UMR Biodiversity Genes & Communities, 69 route d'Arcachon, 33610

12 Cestas, France.

13 Email: [clement.larue@inrae.fr](mailto:clement.larue@inrae.fr)

14 Tel.: +33 535385314

15

16

17 **Running title:** Self-interference in chestnut

18

19

## 1 ABSTRACT

- 2 • *Background and Aim.* In gynodioecious plants, male-sterile individuals must have a female  
3 advantage to coexist with bisexual individuals. In European chestnuts, characterized by a  
4 form of late-acting self-incompatibility, male-fertile trees produce large amounts of pollen  
5 when female flowers are receptive, resulting in abundant self-pollination. Here we study  
6 whether male-sterile chestnut trees have an increased fruit set compared to male-fertile trees  
7 because they escape from the negative consequences of self-pollination on ovules, a case of  
8 self-interference.
- 9 • *Methods.* We measured fruit set of 242 male-fertile and male-sterile trees during three  
10 consecutive years. To test experimentally the hypothesis of negative interference of self-  
11 pollen on ovules as the origin of the female advantage of male-sterile trees, we emasculated  
12 male-fertile trees and compared their fruit set with that of control male-fertile trees. We  
13 performed the same experiment on male-sterile trees by removing the sterile but rewarding  
14 male catkins as a natural control to test for the effect of decreased insect attractiveness on  
15 fruit set.
- 16 • *Key Results.* The fruit set of male-sterile trees is higher than that of male-fertile trees by a  
17 factor of two in some years. Following emasculation, male-fertile trees have a higher fruit  
18 set than control male-fertile trees, pointing to a negative effect of the massive amount of  
19 self-pollen produced by fertile male catkins on fertilization probability of female flowers. In  
20 contrast, emasculated male-sterile trees had a lower fruit set than control male-sterile trees,  
21 pointing to a decrease in insect attractiveness after removing nectar-producing male catkins.
- 22 • *Conclusions.* Our emasculation experiment showed that sexual interference results in  
23 massive ovule discounting in male-fertile trees, sufficient for accounting for the persistence  
24 of female trees in natural populations of European chestnut trees.

25 **Key-words:** Fagaceae, *Castanea*, gynodioecy, late-acting self-incompatibility, sexual interference,

1 ovule discounting, emasculation experiment, self-pollen

## 2 INTRODUCTION

3 In angiosperms, most species have retained the ancestral floral organization, with male and female  
4 reproductive organs combined with the perianth (Yampolsky 1922). Starting with this already  
5 relatively complex arrangement, flowering plants have further evolved, resulting in an amazing  
6 variety of reproductive systems at the flower, inflorescence or whole plant level, constrained by the  
7 breeding system, pollination mode, and sexual interactions. For example, in gynodioecious  
8 species, cosexual and unisexual (female) individuals coexist. The evolutionary mechanisms leading  
9 to the evolution of unisexuality in plants have represented one major research line since Darwin  
10 (1877). One enduring question is why cosexuality, in which transmission of genes of an individual  
11 can take place via both pollen grains and ovules, is sometimes replaced by unisexuality, in which  
12 transmission of genes can only be assured by one route, pollen grains or ovules (Barrett 2010;  
13 Dufay and Billard 2012).

14 A potential route to dioecy is the gynodioecy pathway (Barrett 2002; Dufay et al. 2014). For  
15 gynodioecious populations to be maintained in natural populations, female (i.e. male-sterile)  
16 individuals must have an advantage over bisexual (male-fertile) individuals. A first possible  
17 advantage is resources reallocation from the male to the female function, originally proposed by  
18 Darwin (1877). A second possible advantage is the avoidance of inbreeding due to obligate  
19 outcrossing in females, a view supported by the rarity of strictly allogamous gynodioecious species  
20 (Ross 1970; Arroyo and Raven 1975; Dufay and Billard 2012). However, even if they are a  
21 minority, fully allogamous gynodioecious species do exist (Kikuzawa 1989; Dufay and Billard  
22 2012; Wang et al. 2021). In these species, outcrossing is enforced by self-incompatibility or  
23 complete dichogamy, ruling out inbreeding avoidance as the cause of female advantage. Another  
24 mechanism of female advantage that might apply to these outcrossing species but that is rarely

1 considered is the release from sexual interference. Sexual interference between maternal and  
2 paternal functions in cosexual plants was discovered relatively recently and remains understudied  
3 (Lloyd and Webb 1986; Barrett 2002). An example of sexual interference shown to promote the  
4 evolution of gynodioecy is sexual conflict over the length of male versus female maturity phases  
5 within hermaphroditic flowers (Tonnabel 2021; Wang et al. 2021). Sexual interference could also  
6 directly lead to gamete wastage and reduced fitness. For instance, self-pollination can decrease  
7 female fitness by diminishing seed set, even in self-incompatible species (de Jong et al. 1993). At  
8 least two mechanisms can be involved. First, self-pollen can clog stigmas and pre-empt space,  
9 thereby reducing the chances for compatible pollen grains to establish on stigmas and germinate.  
10 For example, Galen et al. (1989) showed, with the help of a pollen chase experiment, that pollen  
11 clogging reduces seed set of *Polemonium viscosum* by 40%. Second, pollen tubes from self-pollen  
12 might germinate, grow, penetrate the ovules and make them abort. This results in ovule discounting,  
13 i.e. the elimination of ovules rendered non-functional following interactions with self-pollen  
14 (Barrett et al. 1996). For example, Waser and Price (1991) applied a mix of self and outcross pollen  
15 on flowers of *Ipomopsis aggregata*. They showed that seed set decreased by 42% compared to the  
16 situation where they used only outcross pollen. These negative effects of self-pollen on seed set  
17 were reported in species with late-acting self-incompatibility systems (Seavey and Bawa 1986).

18 To test if sexual interference is taking place and results in seed discounting, emasculation  
19 experiments can be used. For instance, de Jong et al. (1992) showed that seed set of emasculated  
20 *Ipomopsis aggregata* individuals increased by 20% compare to the control. As the size of the plant  
21 increased, the negative effects of self-pollination increased (de Jong et al. 1993). However, only one  
22 study to date has shown that sexual interference through seed discounting following self-pollination  
23 can drive the evolution of gynodioecy. Kikuzawa (1989), working on the self-incompatible  
24 gynodioecious shrub *Daphne kamtchatica* in Japan, showed that emasculation strongly increased  
25 fruit set of hermaphrodite flowers. He proposed that clogging by pollen grains of its own flower (a

1 form of self-pollen interference) was a main factor driving the evolution towards gynodioecy in this  
2 species.

3 European chestnut (*Castanea sativa*) is an ecologically and economically important Fagaceae tree  
4 from the Mediterranean region characterized by massive and synchronous blooming with huge  
5 pollen production. This self-incompatible monoecious tree with non-rewarding female flowers is  
6 gynodioecious, as some natural populations include both male-fertile and male-sterile trees (Larue  
7 2021 and unpublished observations). This suggests that male-sterile trees must have a female  
8 advantage to persist. One feature of special interest for the present study is that the male-sterile  
9 trees still harbour nectar-producing male catkins that attract pollinators (Larue et al. 2021a). Here,  
10 we first quantify female advantage in this species by comparing fruit set in male-fertile and male-  
11 sterile trees in a chestnut germplasm collection during three different years and using different  
12 sampling strategies. Second, we assess the importance of self-pollen interference in an experiment  
13 where we remove male catkins not only from male-fertile but also from male-sterile chestnut trees,  
14 a unique situation that should help disentangle the different functions of male organs on female  
15 fitness.

16

## 17 MATERIALS AND METHODS

### 18 Chestnut floral biology

19 The Fagaceae family includes wind-pollinated tree species such as oaks (*Quercus spp.*) and beeches  
20 (*Fagus spp.*) and insect-pollinated species such as chestnuts (*Castanea spp.*) (Larue et al. 2021a;  
21 Petit and Larue 2022). Chestnut trees are characterized by massive blooming, huge pollen  
22 production and the largest pollen:ovule ratio ever reported in plants (Larue et al. 2021a). They are  
23 characterized by multiple and complex mechanisms that limit self-pollination (Xiong et al. 2019;

1 Larue et al. 2022). At the flower level, chestnuts are monoecious: they have separate male and  
2 female flowers. At the inflorescence level, chestnuts are andromonoecious: they produce unisexual  
3 male catkins with only male flowers and bisexual catkins composed of one or two female  
4 inflorescences associated with a single male catkin (Larue et al. 2021a). They have a complex  
5 phenology called duodichogamy, characterized by two peaks of pollen emission (Stout 1928),  
6 which reduces the risk of self-pollination but does not eliminate it completely (Hasegawa et al.  
7 2017). Unisexual male catkins are the first to bloom and release huge quantities of pollen, about  
8 97% of the total amount (Larue et al. 2021a). Male flowers continue to emit pollen when non-  
9 rewarding female flowers of the same tree become receptive. In male-fertile trees, the great majority  
10 (>90%) of pollen deposited on stigmas of female flowers is self-pollen, even if the ultimate rate of  
11 self-fertilisation is very low (0.3%) (Hasegawa et al. 2009). Xiong et al. (2019) have demonstrated  
12 that self-incompatibility has two causes: first, a prezygotic late-acting self-incompatibility  
13 mechanism, with a lower percentage of ovule penetration and double fertilisation in selfed vs.  
14 crossed ovules; second, an early-acting inbreeding depression that results in the abortion of most of  
15 the self-fertilized ovules. Hence, the probability to observe ovule discounting following self-  
16 pollination in this self-incompatible mass-flowering tree species is very high.

17 In European chestnuts, some trees are completely or partly male-sterile (Solignat and Chapa 1975 ;  
18 Figure 1). This male sterility is likely of cytoplasmic origin (Sisco et al. 2014). It causes anomalies  
19 to male staminate flowers, ranging from male flowers with fully aborted stamens to flowers with  
20 short stamen filaments that produce scarce amounts of mostly non-functional pollen (Bounous et al.  
21 1992). Interestingly, the corresponding male-sterile catkins continue to produce nectar and attract  
22 insects (Larue et al. 2021a).

23 Chestnut trees should be good models to study female advantage. First, some preliminary  
24 indications exist in the literature that male-sterile chestnut trees have higher fruit set than male-  
25 fertile trees (Pereira-Lorenzo and Ramos-Cabrer 2004). Second, fruit set is easy to estimate in

1 chestnuts. A female inflorescence is typically composed of three female flowers located side by  
2 side. The inflorescence develops into a burr; in each burr, each of the three flowers, if pollinated,  
3 gives a nut (a fruit with a single seed surrounded by a closed pericarp), and if not pollinated, an  
4 empty fruit (Figure 2). Multi-seeded chestnuts exist but are extremely rare (< 1%). Hence, the  
5 proportion of developed fruits per burr should provide an indication on pollination success. Third,  
6 because chestnut is monoecious and male and female inflorescences are physically separated  
7 (Figure 3), it is technically feasible to emasculate whole trees or branches to test the consequences  
8 of self-pollen on fruit production. There is no need to remove male flowers individually as they are  
9 packed together into inflorescences that can be removed as one unit, even in bisexual catkins, where  
10 all male flowers are located at the distal tip of the catkin.

11

## 12 [Estimating female advantage](#)

### 13 **Study site**

14 For this work, we used the INRAE chestnut germplasm collection located in Villenave d'Ornon  
15 (44.788319 N, -0.577062 E) (Larue et al. 2021b). There are 242 trees (ramets) corresponding to 92  
16 different genotypes (clones) assigned to different chestnut species: the European chestnut *C. sativa*,  
17 the Japanese chestnut *C. crenata*, the Chinese chestnut *C. mollissima* and their interspecific hybrids.  
18 Among the clones, 62 are male-fertile and 30 are male-sterile, corresponding to 156 (64%) male-  
19 fertile and 86 (36%) male-sterile ramets.

### 20 **Fruit set**

21 To estimate fruit set, i.e. the proportion of female flowers giving a fruit, we sampled burrs from all  
22 trees from the INRAE chestnut germplasm collection in 2018 and 2019. In 2018, we aimed at  
23 assessing at least 20 burrs per tree; in 2019, we targeted at least 30 burrs to increase resolution. We

1 measured fruit set in all trees that had produced at least five burrs (i.e.,  $\geq 15$  female flowers),  
2 corresponding to 196 trees in 2018 and 222 trees in 2019.

### 3 **Burr set**

4 In 2020, we measured fruit set differently on a subset of 18 trees, by tracking the fate of female  
5 inflorescences from spring to autumn. We estimated burr set by dividing the number of burrs  
6 counted in August by the number of female inflorescences counted during flowering in June. We  
7 then estimated the overall pollination success by multiplying burr set by fruit set. Among these 18  
8 trees, there were nine male-fertile and nine male-sterile trees. For comparison, we also present fruit  
9 set estimates for these 18 trees in 2018 and in 2019.

10

### 11 **Emasculation experiment**

#### 12 **Study site**

13 To check for self-interference, we carried out an emasculation experiment and compared fruit set of  
14 emasculated trees with that of control trees. This experiment was performed in 2019, in three  
15 orchards of the INVENIO experimental station in Douville (45.019723 N, 0.614637 W).

#### 16 **Plant material**

17 We selected six hybrid varieties, three male-sterile ones ('Bellefer', 'OG19' and 'Bouche de  
18 Bétizac') and three male-fertile ones ('Florifer', 'Maraval' and 'Marigoule'). They are all hybrids  
19 between *C. sativa* and *C. crenata* except 'Bellefer', which is a complex three-way hybrid. These  
20 trees are planted in three nearby orchards. The first orchard is composed of 8-year-old trees  
21 belonging to 'Bellefer', 'OG19', 'Florifer' and 'Maraval' varieties. The second orchard is  
22 composed of 20 m-high trees belonging to 'Bouche de Bétizac' and 'Marigoule' varieties. We  
23 replicated the experiment on 'Marigoule' variety in a third orchard, because 'Marigoule' is very



1 susceptible to cynips (*Dryocosmus kuriphilus*), which complicates fruit set measurements. Indeed,  
2 following cynips attacks, female flowers tend to proliferate, resulting in atypical inflorescences with  
3 more than three flowers that are difficult to use to estimate fruit set.

#### 4 **Modalities**

5 To remove male flowers for the emasculation treatment, we cut all unisexual male catkins and the  
6 male part of bisexual catkins with a scissor (Figure 3). As these two types of flowers emerge at  
7 different times, we proceeded in three steps before trees started to flower. At the first pass, in the  
8 end of May, we removed all unisexual male catkins. At the second pass, we checked if no unisexual  
9 male catkins remained and we removed the male part of bisexual catkins. At the third and last pass,  
10 we removed the male flowers of bisexual catkins that remained.

11 We emasculated both male fertile and male sterile varieties. Male-sterile trees still have male  
12 catkins, which strongly resemble those of male-fertile trees except that they have aborted stamens.  
13 Even though they no longer produce pollen, these sterile catkins produce nectar and attract insects.  
14 We emasculated these male-sterile trees to evaluate the decrease in insect attractiveness or possible  
15 reallocation of resources in the female function following their removal.

16 For each modality, we selected five ‘OG19’ trees, six ‘Florifer’ trees, five ‘Bellefer’ trees and two  
17 ‘Maraval’ trees. Hence, there were 18 control and 18 emasculated chestnuts. For young trees, we  
18 applied this treatment to each individual tree. For older trees, we applied the treatment to single  
19 branches. In the first orchard, we selected five ‘Bouche de Bétizac’ and five ‘Marigoule’ trees. For  
20 each tree, we selected 20 branches and used ten for each modality. We replicated these two  
21 modalities on three more ‘Marigoule’ trees from another orchard.

22

## 1 **Statistical analyses**

### 2 **Data analysis**

3 We performed all analyses with R software (v3.6.6; R Core Team 2013) The corrected fruit set was  
4 calculated with basic functions implemented in R, while boxplots and histograms are computed  
5 with the ggplot2 (v3.6.3; Wickham 2016), ggthemes (v4.2.4; Arnold 2016) and cowplot (v1.1.1;  
6 Wilke 2020) packages.

### 7 **Corrected fruit set**

8 In the large-scale fruit set study of 2018 and 2019, we excluded rare atypical burrs containing fewer  
9 or more than three fruits. We also decided not to use burrs with zero fruits. These burrs with three  
10 empty fruits may abort during summer, so fruit set assessed in the fall may be biased. We therefore  
11 model fruit set using only burrs with at least one developed fruit. Pollination of each female flower  
12 is independent (Larue 2021). Thus, to obtain a fruit set estimate reflecting the probability for a  
13 flower to give a fruit, we used a zero-deflated binomial distribution to correct for the omission of  
14 empty burrs. For a given tree, typical burrs developed from 3-flowers inflorescences with one, two,  
15 or three developed fruits are noted  $x_1$ ,  $x_2$ , and  $x_3$  while the total number of harvested burrs is noted  
16  $x_{tot}$ . Based on the definition of multinomial distribution, a maximum likelihood estimator reflecting  
17 pollination probability  $\hat{p}$  is obtained (Annex 1):

$$\hat{p} = \frac{3}{2} - \sqrt{3 \frac{x_{tot}}{x_1 + 2x_2 + 3x_3} - \frac{3}{4}}$$

18 All these estimates are automatically computed for all trees in R using the *apply()* function.

### 19 **Estimation of female advantage**

20 We represented the fruit set of male-fertile and male-sterile trees with two boxplots, one for each  
21 year, using *geom\_boxplot()* function from ggplot2 package and ggthemes package to adjust graphic

1 colours. Female advantage is the difference in average fruit set between the two types of trees. We  
2 tested its significance with an Anova. On the subset of 18 trees on which we had counted flowers in  
3 2020, we tested the difference in fruit set between male-sterile and male-fertile trees with a  
4 unilateral Student  $t$  test. We also calculated the female advantage as a ratio, by dividing the fruit set  
5 of male-sterile trees by the fruit set of male-fertile trees

## 6 **Emasculation experiment**

7 We drew histograms representing fruit set of control and emasculated trees with the `geom_bar()`  
8 function of ggplot2 package and adjust graphic colours with ggthemes package. We tested the  
9 significance of the difference between these two modalities with a Fisher exact test.

10

## 11 **RESULTS**

### 12 **Female advantage**

13 There were 176 trees in 2018 (110 male-fertile and 66 male-sterile) and 206 trees in 2019 (134  
14 male-fertile and 72 male-sterile) that produced enough fruits to measure fruit set. We harvested 22  
15 burrs (5-62) per tree in 2018 and 36 burrs (6-383) in 2019. In 2018, the average fruit set of male-  
16 fertile trees was 61% and that of male-sterile trees was 82% (figure 4, top), a highly significant  
17 difference (Anova,  $p < 10^{-11}$ ). In 2019, the average fruit set of male-fertile trees was 55% and that of  
18 male-sterile trees was 83% (figure 4, bottom), again a very significant difference (Anova,  $p < 10^{-16}$ ).

19 In the subsample of 18 trees, male-sterile trees also had a higher fruit set than that of male-fertile  
20 trees (Table 1,  $t$ -test,  $p$ -value  $< 0.008$ ). For male-sterile trees, average fruit set was 0.83 in 2018,  
21 0.77 in 2019 and 0.69 in 2020. For male-fertile trees, average fruit set was 0.64 in 2018, 0.49 in  
22 2019 and 0.34 in 2020. Female advantage (male-sterile/male-fertile fruit set ratio) increased across  
23 the three years, from 1.30 in 2018, to 1.56 in 2019 and 2.01 in 2020. In 2020, we tracked the fate of

1 inflorescences to better estimate fruit set. Male-sterile trees had slightly more female inflorescences  
2 even though the difference was not significant (Table 1, *t*-test,  $p > 0.3$ ). Similarly, the number of  
3 burrs was higher in male-sterile trees than in male-fertile ones but the difference was not significant  
4 (Table 1, *t*-test,  $p > 0.19$ ). Hence, there was no evidence that burr set varies according to a tree's  
5 sexual type (Table 1, *t*-test,  $p > 0.11$ ). To obtain the overall pollination success, we multiplied burr  
6 set by fruit set. We found that overall pollination success in 2020 is 0.65 for male-sterile trees and  
7 0.28 for male-fertile trees, a female advantage of 2.3.

8

## 9 Emasculation experiment

10 The emasculation treatment resulted in a significant decrease in fruit set compared to controls for  
11 two of the three male-sterile varieties (figure 5, left). For 'Bellefer', fruit set in control trees is 91%  
12 whereas it is 81% for emasculated trees, a significant decrease (F test,  $p < 10^{-5}$ ). Similarly, for  
13 'Bouche de Bétizac', fruit set in control trees is 95% whereas it is 85% for emasculated trees, again  
14 a significant decrease (F test,  $p < 10^{-7}$ ). Instead, for 'OG19', fruit set in control trees is 77% whereas  
15 it is 82% for emasculated trees, a non-significant increase (F test,  $p > 0.82$ ). In contrast to what we  
16 found for male-sterile trees, the emasculation treatment resulted in a significant increase in fruit set  
17 compared to controls for two of the three male-fertile varieties (figure 5, right). For 'Marigoule',  
18 fruit set in control trees is 52% whereas it is 67% for emasculated trees, a significant increase (F  
19 test,  $p < 10^{-5}$ ). Similarly, for 'Florifer', fruit set in control trees is 46% whereas it is 63% for  
20 emasculated trees, a significant increase (F test,  $p < 10^{-10}$ ). For 'Maraval', fruit set of control trees is  
21 73% compared to 78% for emasculated trees, a non-significant increase (F test,  $p > 0.16$ ).

22

## 1 DISCUSSION

2 By comparing fruit set of a large array of male-sterile and male-fertile trees, we found that male-  
3 sterile trees have a strong female advantage over male-fertile ones: they produced 34% more fruits  
4 in 2018 and 55% more in 2019. In 2020, this female advantage was over 100%. When we consider  
5 burr set along with fruit set, the female advantage of male-sterile trees is even greater. This more  
6 than two-fold advantage is sufficient to explain the maintenance of male sterility in natural  
7 populations, regardless of the mode of inheritance of male sterility (Lewis 1941). Different chestnut  
8 species and their hybrids are included in our study but this should not affect the conclusions, as we  
9 could not find any evidence for differences in fruit set between the different species present in the  
10 orchard when controlling for sexual type (Larue 2021).

11 Results from the emasculation experiment point to a major role for self-pollen interference in the  
12 origin of this female advantage. When we removed male catkins from male-fertile trees, fruit set  
13 increased. In contrast, when we removed male flowers from male-sterile trees, fruit set decreased or  
14 remained unchanged. We argue that these opposite effects of emasculation on fruit set in these two  
15 types of trees are due to decreased self-pollination and decreased seed discounting in emasculated  
16 male-fertile trees, and reduced attractiveness to pollinators caused by the removal of nectar-  
17 producing male-sterile catkins in male-sterile trees. Together, the findings suggest that in male-  
18 fertile trees, the positive effect of reduced self-interference on fruit set generated by emasculation  
19 overcomes the negative effect of reduced insect attractiveness generated by emasculation, resulting  
20 overall in an increased fruit set. We also note that resource reallocation from the male to the female  
21 flowers is unlikely to cause increased fruit set. Indeed, following emasculation of male-sterile trees,  
22 we did not observe increased fruit set, as expected if reallocation of resources from male catkins to  
23 the female function was taking place. Instead, we found the opposite trend, suggesting that the  
24 removal of nectar-producing sterile male catkins does not benefit the female function. The lack of

1 transfer of resources from the male to the female function following emasculation makes sense as  
2 the catkins of male-sterile trees differ little from the catkins of male-fertile trees except for the  
3 abortion of the tiny stamens.

4 Overall, our results suggest that self-pollen interference has a strong negative impact on fruit set. In  
5 a related study, we used a process-based model to predict fruit set in the same site, combining fruit  
6 set measures with paternity analyses. The model was very accurate, but only when we accounted for  
7 self-pollen interference and associated ovule discounting (Larue et al. 2022). Following chemical  
8 emasculation of Chinese chestnut (*C. mollissima*), Zongyun and Kuiying (2009) have reported an  
9 increase fruit yield, by up to 39%, indicating that self-pollination has a strong negative effect on  
10 fruit production in this other chestnut species.

11 Interestingly, in our study, emasculation experiments of male-fertile trees involving either single  
12 branches or entire trees result in similar increases in fruit set. Insects such as beetles, which are  
13 particularly abundant in orchards under open conditions, can be seen walking back and forth on the  
14 crown, presumably bringing much self-pollen from nearby male catkins on female inflorescences.  
15 By emasculating entire branches, we remove sources of pollen near female inflorescences. Hence,  
16 we reduce self-pollination brought about by the behaviour of these insects, but not by that of insects  
17 flying among branches of the same tree. This suggests that insects that tend to walk on  
18 inflorescences rather than to fly from one place to another are major causes of self-pollination and  
19 eventually of self-interference and fruit set reduction.

20 We propose that this female advantage explains the persistence of male-sterile trees in wild  
21 population of European chestnut, making this tree one of the few gynodioecious tree species  
22 (Yampolsky 1922; Bawa and Opler 1975; Bawa 1980; Gibson and Diggle 1997; Dufay et al. 2014).  
23 Interestingly, this increased fruit set has been taken advantage of in chestnut cultivation in Europe,

1 as male-sterile varieties are overrepresented in chestnut orchards compared to male-fertile ones  
2 (Pereira-Lorenzo et al. 2006; Furones-Pérez and Fernández-López 2009; Martín et al. 2017).

3 Self-pollen interference resulting in ovule discounting has to date not been considered as a potential  
4 factor in the evolution of unisexuality, except in the pioneer study of Kikuzawa (1989) on *Daphne*  
5 *kamtchatica* in Japan. At this point, with just two studies in *Daphne* and in *Castanea* suggesting  
6 that self-interference could lead to the evolution of gynodioecy, it is difficult to appreciate the  
7 importance of self-interference in the evolution of gender polymorphism. To investigate the matter  
8 further, a review of the effect of emasculation experiments on seed set, especially in self-  
9 incompatible plants, would be useful. It could help evaluate the general importance of this under-  
10 studied mechanism.

11

## 12 FUNDING

13 This paper was part of the PhD and postdoc of CL. The Cifre thesis (Conventions Industrielles de  
14 Formation par la Recherche) was supported by the ANRT (Association Nationale de la Recherche  
15 de la Technologie, convention Cifre N° 2018/0179). It was funded by Invenio, the Région  
16 Nouvelle-Aquitaine (Regina project N° 22001415-00004759 and chestnut pollination project  
17 N° 2001216-00002632), by INRAE (Institut National de Recherche pour l'Agriculture et  
18 l'Environnement) and by ANR (project ANR-21-PRRD-0008-01).

19

## 20 ACKNOWLEDGEMENTS

21 We thank Teresa Barreneche (chestnut germplasm collection administrator) for her invaluable  
22 support. This study was possible thanks to the continuous support of INRAE experimental unit

1 Vigne Bordeaux (UEVB) in Villenave d'Ornon and of Xavier Capdevielle of UMR Biogeco who  
2 manage the experimental orchards used for this study. We thank the INVENIO chestnut team and  
3 the numerous seasonal workers who permitted to set up the emasculation experiment. Many thanks  
4 to Olivier Lepais and to Etienne Klein for developing a fruit set model. Mathilde Dufay comments  
5 greatly helped improve an earlier version of this manuscript.

6 CL, RJP, Yannick Mellerin, Céline Lalanne and Chantal Helou Bagate estimated fruit set in the  
7 INRAE chestnut germplasm collection. CL, Nathalie Lebarbier and William Genoud carried out the  
8 emasculation experiments in Invenio orchards. CL and RJP estimated fruit set in INVENIO  
9 orchards. CL, Etienne Klein and Olivier Lepais modelled fruit set. CL and RJP carried out statistical  
10 analyses. CL wrote the first draft of this article and RJP revised it.

11

## 12 LITERATURE CITED

13 Arnold JB (2016) ggthemes: extra themes, scales and geoms for “ggplot2”

14 Arroyo MTK, Raven PH (1975) The evolution of subdioecy in morphologically gynodioecious  
15 species of *Fuchsia* sect. *encliandra* (Onagraceae). *Evolution* 29:500–511.

16 <https://doi.org/10.2307/2407262>

17 Barrett SCH (2010) Understanding plant reproductive diversity. *Phil Trans R Soc B* 365:99–109.

18 <https://doi.org/10.1098/rstb.2009.0199>

19 Barrett SCH (2002) The evolution of plant sexual diversity. *Nat Rev Genet* 3:274–284.

20 <https://doi.org/10.1038/nrg776>

21 Barrett SCH, Lloyd DG, Arroyo J (1996) Styler polymorphisms and the evolution of heterostyly in  
22 *Narcissus* (Amaryllidaceae). In: Lloyd DG, Barrett SCH (eds) *Floral Biology*. Springer US, Boston,  
23 MA, pp 339–376

24 Bawa KS (1980) Mimicry of male by female flowers and intrasexual competition for pollinators in  
25 *Jacaratia dolichaula* (D. Smith) woodson (Caricaceae). *Evolution* 34:467–474.

26 <https://doi.org/10.2307/2408216>



- 1 Bawa KS, Opler PA (1975) Dioecism in tropical forest trees. *Evolution* 29:167.  
2 <https://doi.org/10.2307/2407150>
- 3 Bounous G, Paglietta R, Peano C (1992) Methods for observing chestnut pollen viability,  
4 germinability and pollen tube growth. *Proc Int Chestnut Conf, Morgantown, USA* 76–78
- 5 Darwin C (1877) *The Different Forms of Flowers on Plants of the Same Species*. London UK
- 6 de Jong TJ, Waser NM, Klinkhamer PG (1993) Geitonogamy: The neglected side of selfing. *Trends*  
7 *Ecol Evol* 8:321–325. [https://doi.org/10.1016/0169-5347\(93\)90239-L](https://doi.org/10.1016/0169-5347(93)90239-L)
- 8 de Jong TJ, Waser NM, Price MV, Ring RM (1992) Plant size, geitonogamy and seed set in  
9 *Ipomopsis aggregata*. *Oecologia* 89:310–315. <https://doi.org/10.1007/BF00317407>
- 10 Dufay M, Billard E (2012) How much better are females? The occurrence of female advantage, its  
11 proximal causes and its variation within and among gynodioecious species. *Ann Bot* 109:505–519.  
12 <https://doi.org/10.1093/aob/mcr062>
- 13 Dufay M, Champelovier P, Käfer J, et al (2014) An angiosperm-wide analysis of the gynodioecy–  
14 dioecy pathway. *Ann Bot* 114:539–548. <https://doi.org/10.1093/aob/mcu134>
- 15 Furones-Pérez P, Fernández-López J (2009) Morphological and phenological description of 38  
16 sweet chestnut cultivars (*Castanea sativa* Miller) in a contemporary collection. *Span J Agric Res*  
17 7:829–843. <https://doi.org/10.5424/sjar/2009074-1097>
- 18 Galen C, Gregory T, Galloway LF (1989) Costs of self-pollination in a self-incompatible plant,  
19 *Polemonium viscosum*. *Am J Bot* 76:1675–1680. <https://doi.org/10.1002/j.1537-2197.1989.tb15152.x>
- 21 Gibson JP, Diggle PK (1997) Structural analysis of female and hermaphroditic flowers of a  
22 gynodioecious tree, *Ocotea tenera* (Lauraceae). *American Journal of Botany* 84:298–307.  
23 <https://doi.org/10.2307/2446003>
- 24 Hasegawa Y, Suyama Y, Seiwa K (2017) Flowering phenology of a duodichogamous self-  
25 incompatible tree species, *Castanea crenata*. *Japanese Journal of Ecology* 67:31–39.  
26 [https://doi.org/10.18960/seitai.67.1\\_31](https://doi.org/10.18960/seitai.67.1_31)
- 27 Hasegawa Y, Suyama Y, Seiwa K (2009) Pollen donor composition during the early phases of  
28 reproduction revealed by DNA genotyping of pollen grains and seeds of *Castanea crenata*. *New*  
29 *Phytol* 182:994–1002. <https://doi.org/10.1111/j.1469-8137.2009.02806.x>

- 1 Kikuzawa K (1989) Floral biology and evolution of gynodioecism in *Daphne kamtchatica* var.  
2 *jezoensis*. Oikos 56:196–202. <https://doi.org/10.2307/3565336>
- 3 Larue C (2021) De la pollinisation à la formation des graines □: le cas du châtaignier. PhD Thesis,  
4 Université de Bordeaux
- 5 Larue C, Austruy E, Basset G, Petit RJ (2021a) Revisiting pollination mode in chestnut (*Castanea*  
6 spp.): an integrated approach. Bot Lett 168:348–372.  
7 <https://doi.org/10.1080/23818107.2021.1872041>
- 8 Larue C, Barreneche T, Petit RJ (2021b) An intensive study plot to investigate chestnut tree  
9 reproduction. Ann For Sci 78:90. <https://doi.org/10.1007/s13595-021-01104-w>
- 10 Larue C, Klein E, Petit R (2022) Sexual interference revealed by joint study of male and female  
11 pollination success in chestnut. Preprints
- 12 Lewis D (1941) Male sterility in natural populations of hermaphrodite plants the equilibrium  
13 between females and hermaphrodites to be expected with different types of inheritance. New Phytol  
14 40:56–63. <https://doi.org/10.1111/j.1469-8137.1941.tb07028.x>
- 15 Lloyd DG, Webb CJ (1986) The avoidance of interference between the presentation of pollen and  
16 stigmas in angiosperms I. Dichogamy. N Z J Bot 24:135–162.  
17 <https://doi.org/10.1080/0028825X.1986.10409725>
- 18 Martín MA, Monedero E, Martín LM (2017) Genetic monitoring of traditional chestnut orchards  
19 reveals a complex genetic structure. Annals of Forest Science 74:1–11.  
20 <https://doi.org/10.1007/s13595-016-0610-1>
- 21 Pereira-Lorenzo S, Ramos-Cabrer AM (2004) Chestnut, an ancient crop with future. In: Dris R, Jain  
22 SM (eds) Production Practices and Quality Assessment of Food Crops Volume 1: Preharvest  
23 Practice. Springer Netherlands, Dordrecht, pp 105–161
- 24 Pereira-Lorenzo S, Ramos-Cabrer AM, Díaz-Hernández MB, et al (2006) Chemical composition of  
25 chestnut cultivars from Spain. Sci Hortic 107:306–314.  
26 <https://doi.org/10.1016/j.scienta.2005.08.008>
- 27 Petit RJ, Larue C (2022) Confirmation that chestnuts are insect-pollinated. Botany Letters 0:1–5.  
28 <https://doi.org/10.1080/23818107.2022.2088612>

- 1 R Core Team (2013) R: A language and environment for statistical computing. R Foundation for  
2 Statistical Computing, Vienne, Autriche. <https://doi.org/URL> <https://www.R-project.org/>
- 3 Ross MD (1970) Breeding systems in *Plantago*. *Heredity* 25:129–133.  
4 <https://doi.org/10.1038/hdy.1970.13>
- 5 Seavey SR, Bawa KS (1986) Late-acting self-incompatibility in angiosperms. *Bot Rev* 52:195–219.  
6 <https://doi.org/10.1007/BF02861001>
- 7 Sisco PH, Neel TC, Hebard FV, et al (2014) Cytoplasmic male sterility in interspecific hybrids  
8 between American and Asian *Castanea* species is correlated with the American D chloroplast  
9 haplotype. *Acta Hort* 215–222. <https://doi.org/10.17660/ActaHortic.2014.1019.32>
- 10 Solignat G, Chapa J (1975) *La Biologie Florale du Châtaignier*. Institut National de Vulgarisation  
11 pour les Fruits Légumes et Champignons, Paris
- 12 Stout AB (1928) Dichogamy in flowering plants. *Bulletin of the Torrey Botanical Club* 55:141–  
13 153. <https://doi.org/10.2307/2480605>
- 14 Tonnabel J (2021) Digest: Sexual conflict as a novel hypothesis for the evolution of gynodioecy\*.  
15 *Evolution* 75:557–558. <https://doi.org/10.1111/evo.14161>
- 16 Wang H, Barrett SCH, Li X, et al (2021) Sexual conflict in protandrous flowers and the evolution of  
17 gynodioecy\*. *Evolution* 75:278–293. <https://doi.org/10.1111/evo.14113>
- 18 Waser NM, Price MV (1991) Reproductive costs of self-pollination in *Ipomopsis aggregata*  
19 (polemoniaceae): are ovules usurped? *Am J Bot* 78:1036–1043. <https://doi.org/10.1002/j.1537-2197.1991.tb14511.x>
- 21 Wickham H (2016) *ggplot2: elegant graphics for data analysis*. Springer-Verlag New York
- 22 Wilke CO (2020) *cowplot: Streamlined Plot Theme and Plot Annotations for “ggplot2”*
- 23 Xiong H, Zou F, Guo S, et al (2019) Self-sterility may be due to prezygotic late-acting self-  
24 incompatibility and early-acting inbreeding depression in Chinese chestnut. *J Am Soc Hortic Sci*  
25 144:172–181. <https://doi.org/10.21273/JASHS04634-18>
- 26 Yampolsky C (1922) *Distribution of Sex Forms in the Phanerogamic Flora*, Gebrüder Borntraeger.  
27 Leipzig
- 28 Zongyun Z, Kuiying L (2009) Effect of chemical thinning catkins on Chinese chestnut yield and  
29 quality. *Acta Hort* 457–460. <https://doi.org/10.17660/ActaHortic.2009.844.64>

1  
2

1 Table 1: Fruit set measured during three consecutive year and detailed pollination success for 2020  
2

| Clone <sup>1</sup> | Ramet <sup>2</sup> | ♂-flowers <sup>3</sup> | Fruits set        |             |             | Details for 2020      |                     |                       |                          |
|--------------------|--------------------|------------------------|-------------------|-------------|-------------|-----------------------|---------------------|-----------------------|--------------------------|
|                    |                    |                        | 2018 <sup>4</sup> | 2019        | 2020        | #♀-inflo <sup>5</sup> | #Burrs <sup>6</sup> | Burr set <sup>7</sup> | <i>Ppol</i> <sup>8</sup> |
| Bétizac            | A_58_O             | S                      | 0.97              | 0.92        | 0.89        | 16                    | 17                  | 1.06                  | 0.95                     |
| Bétizac            | E_80_E             | S                      | NA                | 0.92        | 0.94        | 42                    | 40                  | 0.95                  | 0.90                     |
| Dauphine           | A_64_C             | S                      | 0.63              | 0.42        | 0.23        | 42                    | 33                  | 0.79                  | 0.18                     |
| Dauphine           | E_76_I             | S                      | 0.76              | 0.93        | 0.67        | 5                     | 3                   | 0.60                  | 0.40                     |
| Marlhac            | A_66_Q             | S                      | 0.80              | 0.75        | 0.62        | 254                   | 230                 | 0.91                  | 0.56                     |
| Marlhac            | E_73_D             | S                      | 0.77              | 0.75        | 0.72        | 96                    | 88                  | 0.92                  | 0.66                     |
| Merle              | A_45_E             | S                      | 0.85              | 0.50        | 0.26        |                       |                     |                       |                          |
| Précoce des Vans   | E_40_R             | S                      | 0.96              | 0.92        | 0.95        | 57                    | 46                  | 0.81                  | 0.77                     |
| Précoce des Vans   | E_72_S             | S                      | 0.89              | 0.82        | 0.92        | 25                    | 22                  | 0.88                  | 0.81                     |
| 381                | E_43_O             | F                      | 0.63              | 0.40        | 0.28        | 46                    | 40                  | 0.87                  | 0.24                     |
| 381                | E_52_J             | F                      | 0.67              | 0.47        | 0.29        | 32                    | 28                  | 0.88                  | 0.25                     |
| Despont n3         | A_65_F             | F                      | 0.58              | 0.47        | 0.39        | 49                    | 35                  | 0.71                  | 0.28                     |
| Despont n3         | E_78_E             | F                      | 0.67              | 0.57        | 0.62        | 15                    | 13                  | 0.87                  | 0.54                     |
| Maridonne          | A_60_Q             | F                      | 0.64              | 0.51        | 0.28        | 128                   | 63                  | 0.49                  | 0.14                     |
| Maridonne          | E_50_P             | F                      | 0.73              | 0.75        | 0.62        | 63                    | 47                  | 0.75                  | 0.46                     |
| Marigoule          | A_42_N             | F                      | 0.34              | 0.29        | 0.17        | 44                    | 42                  | 0.95                  | 0.16                     |
| Marigoule          | A_44_Q             | F                      | 0.63              | 0.59        | 0.29        | 29                    | 19                  | 0.66                  | 0.19                     |
| Vignols            | A_55_S1            | F                      | 0.84              | 0.40        | 0.14        |                       |                     |                       |                          |
|                    |                    | ♂-Sterile              | 0.83              | 0.77        | 0.69        | 67.1                  | 59.9                | 0.86                  | 0.65                     |
|                    |                    | ♂-Fertile              | 0.64              | 0.49        | 0.34        | 50.8                  | 35.9                | 0.77                  | 0.28                     |
|                    |                    | <b>Ratio S/F</b>       | <b>1.30</b>       | <b>1.56</b> | <b>2.01</b> | <b>1.32</b>           | <b>1.67</b>         | <b>1.12</b>           | <b>2.30</b>              |
|                    |                    | <b>t-test</b>          | <b>***</b>        | <b>***</b>  | <b>***</b>  | <b>ns</b>             | <b>ns</b>           | <b>ns</b>             | <b>***</b>               |

3

4 <sup>1</sup> Cultivar name of each studied tree

5 <sup>2</sup> Identification code of each studied tree (ramet)

6 <sup>3</sup> Sexual type: male-sterile (S) / male-fertile (F)

7 <sup>4</sup> Fruit sets for 2018, 2019 and 2020

8 <sup>5</sup> Number of female inflorescences counted during the spring

9 <sup>6</sup> Number of burrs counted in August

10 <sup>7</sup> Burr set calculated by dividing the number of burrs by the number of female inflorescences

11 <sup>8</sup> 2020 pollination success calculated by multiplying 2020 fruit set by the corresponding burr set

12

13

## 1 LIST OF FIGURES

2 **Figure 1:** Degrees of male-sterility observed. A) Fully male-sterile tree. Most stamens are aborted  
3 and do not produce pollen. B) Mostly male-sterile tree. Stamens do not protrude from glomerules.  
4 C) Partly male-sterile tree. Stamens slightly protrude from glomerules. D) Fully male-fertile tree.  
5 Stamen filaments are long and largely protrude from glomerules. These trees produce large amounts  
6 of pollen.

7 **Figure 2:** Each burr normally contains three fruits. Each pollinated female flower will give a  
8 developed fruit, otherwise the fruit will be empty. Empty burr (A) and burrs with one (B), two (C)  
9 or three developed fruits (D).

10 **Figure 3:** Chestnuts have two types of catkins: many unisexual male catkins that flower first  
11 (black) and few bisexual catkins (white) located at the tip of the branches that flower last.

12 **Figure 4:** Fruit set of male-fertile (left) and male-sterile trees (right) from INRAE chestnut  
13 collection calculated in 2018 (top) and 2019 (bottom).

14 **Figure 5:** Fruit set of control (red) and emasculated trees (blue). The three male-sterile varieties are  
15 on the left and the three male-fertile varieties on the right.

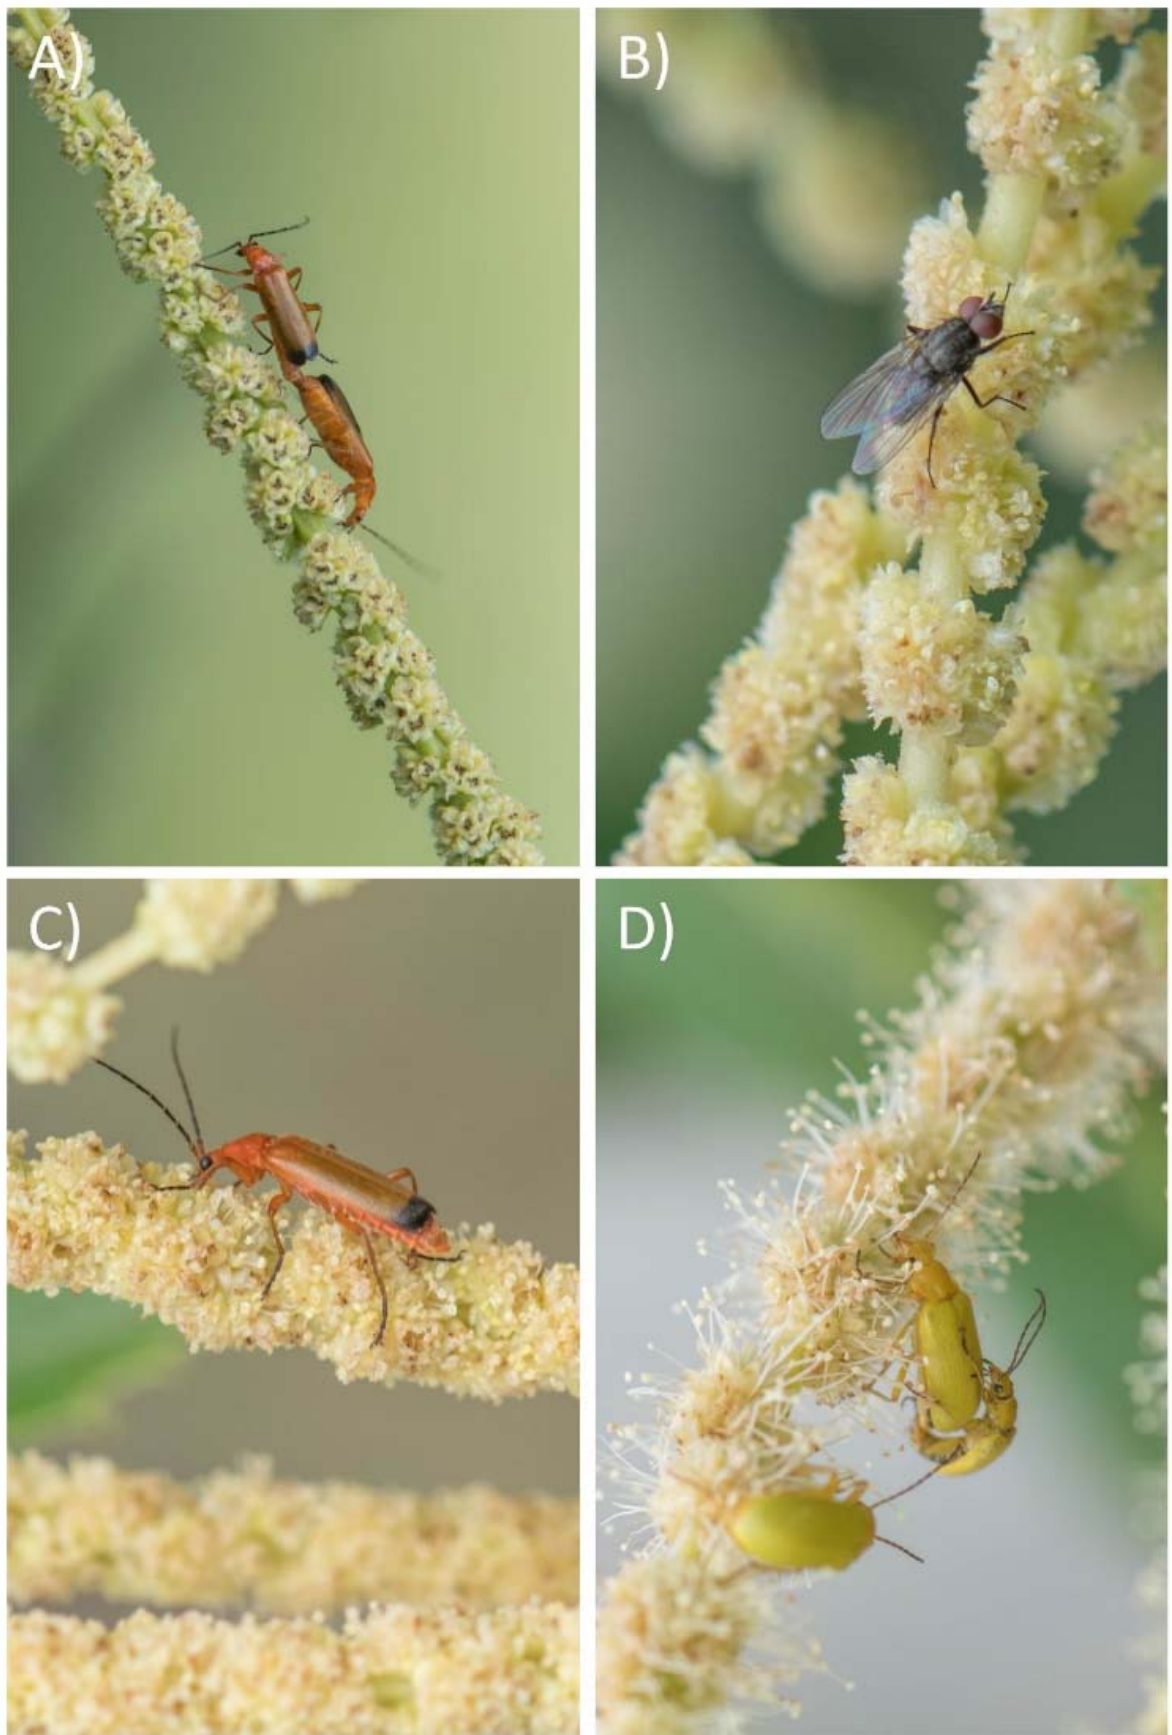

1 *Figure 1: Degrees of male-sterility observed. A) Fully male-sterile tree. Most stamens are aborted and do not produce pollen. B) Mostly male-sterile tree. Stamens do not protrude from glomerules. C) Partly male-sterile tree. Stamens slightly protrude from glomerules. D) Fully male-fertile tree. Stamen filaments are long and largely protrude from glomerules. These trees produce large amounts of pollen.*

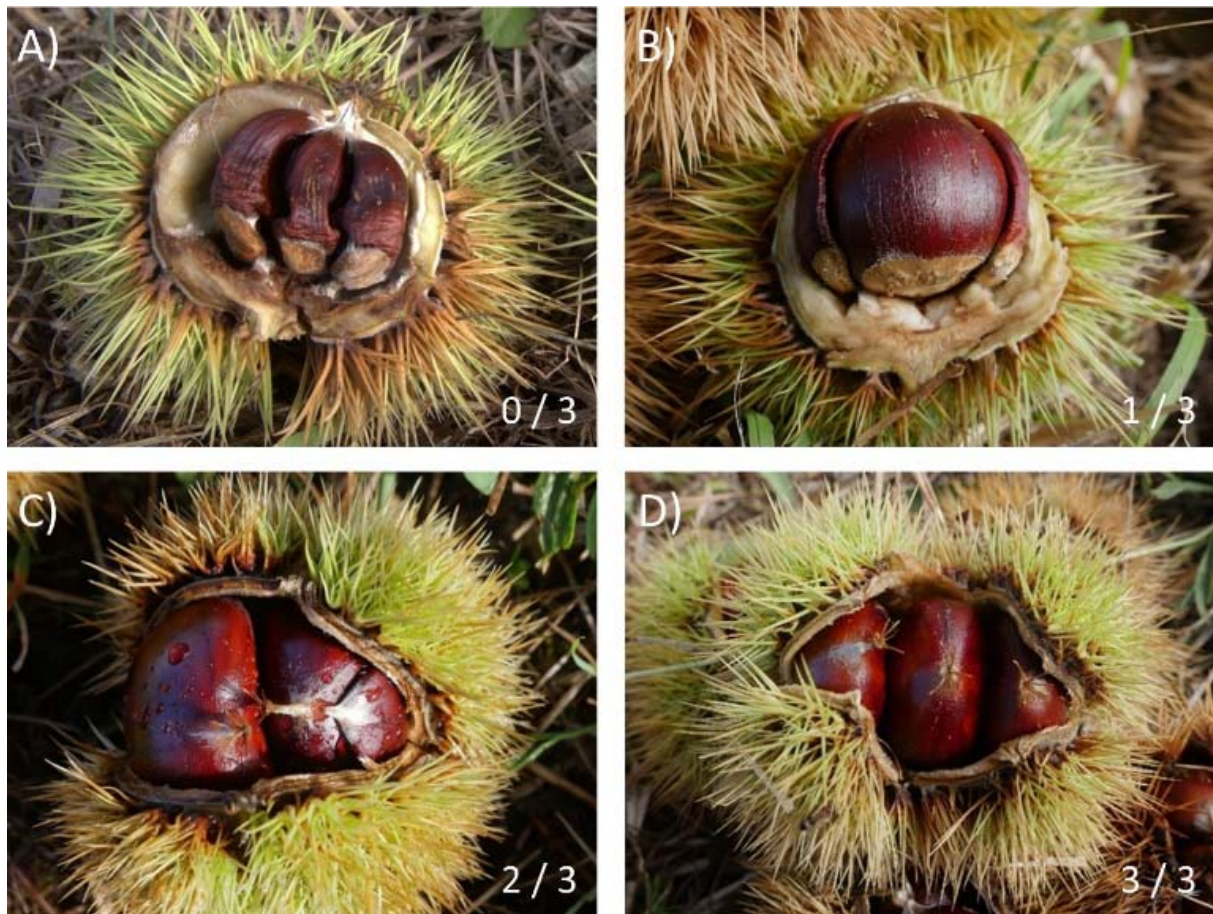

Figure 2: Each burr normally contains three fruits. Each pollinated female flower will give a developed fruit, otherwise the fruit will be empty. Empty burr (A) and burrs with one (B), two (C) or three developed fruits (D).

1



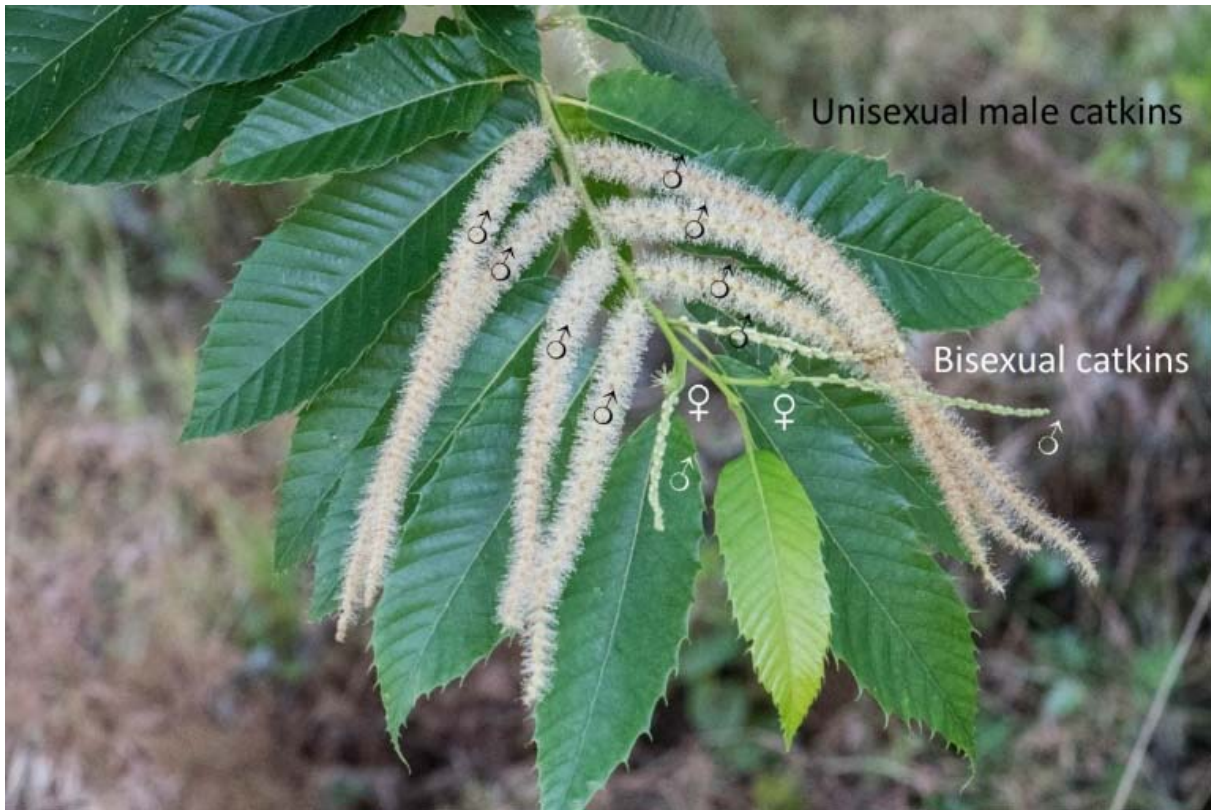

*Figure 3: Chestnuts have two types of catkins: many unisexual male catkins that flower first (black) and few bisexual catkins (white) located at the tip of the branches that flower last.*

1

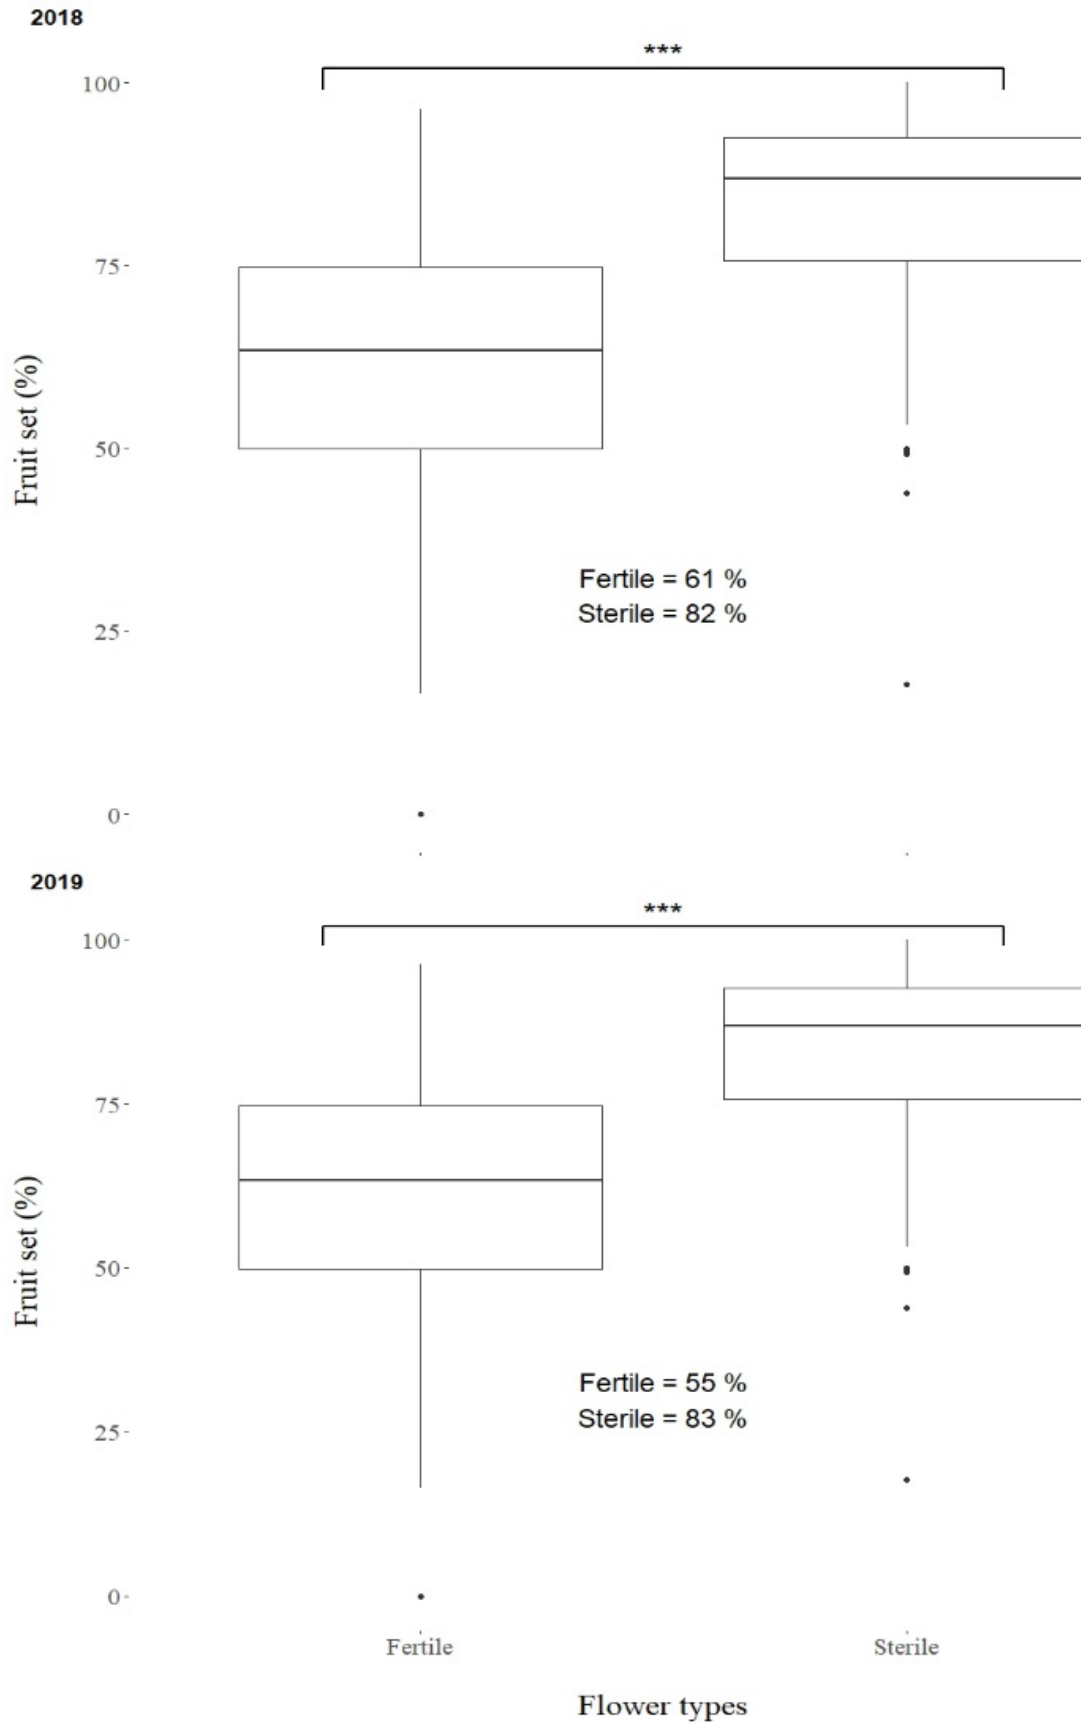

1

Figure 4: Fruit set of male-fertile (left) and male-sterile trees (right) from INRAE chestnut collection calculated in 2018 (top) and 2019 (bottom).

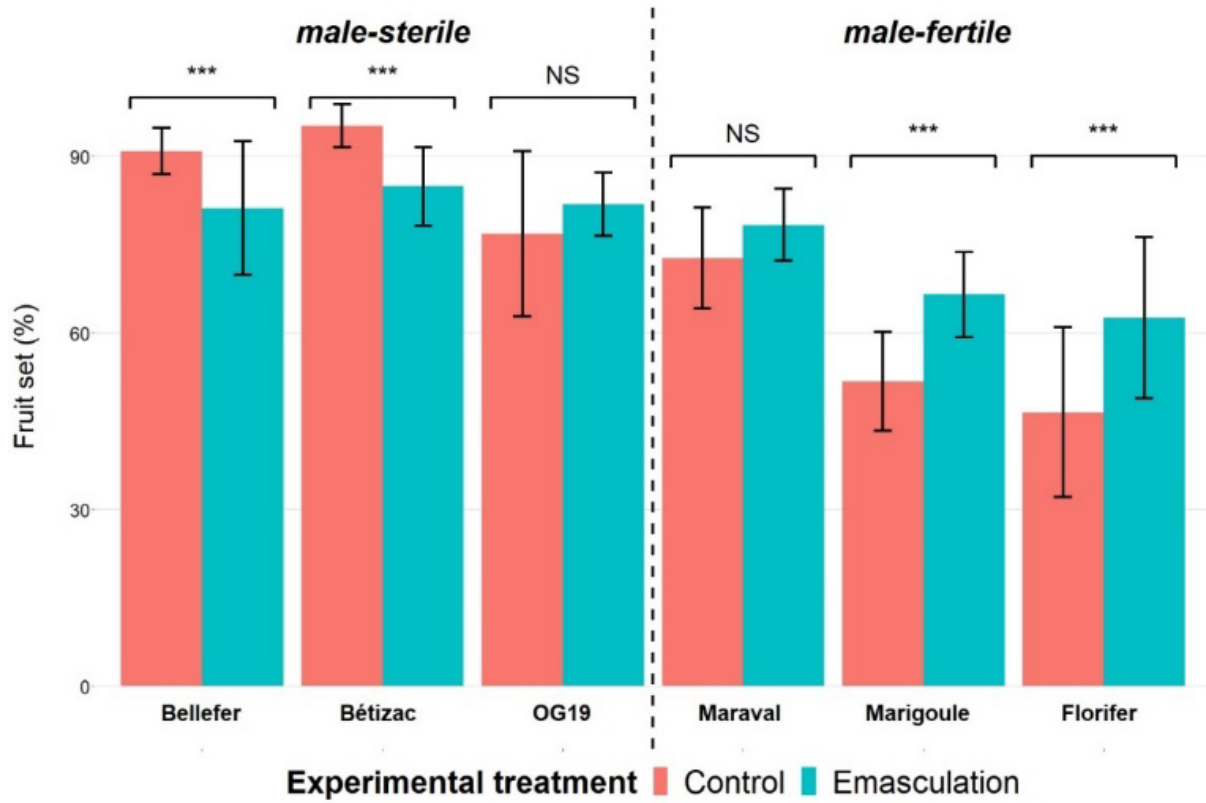

Figure 5: Fruit set of control (red) and emasculated trees (blue). The three male-sterile varieties are on the left and the three male-fertile varieties on the right.

1

## 1 ANNEX 1

2 How to estimate pollination success?

3 **Proof.**

4 This proof was written for this study by Etienne Klein, INRAE researcher at URFM Avignon.

5 The observations result from  $x_{tot}$  observed burrs among which  $(x_1, x_2, x_3)$  contain 1, 2 or 3 fruits.

6 Since we did not collect burrs with 0 fruits,  $x_1 + x_2 + x_3 = x_{tot}$ .

7 Because we assume that each burr is independent of all the others, we can consider that  $(x_1, x_2, x_3)$

8 follows a multinomial distribution with parameters  $x_{tot}$  and  $(\pi_1, \pi_2, \pi_3)$ , with

$$\pi_1 = \frac{3p(1-p)^2}{1-(1-p)^3}$$

$$\pi_2 = \frac{3p^2(1-p)}{1-(1-p)^3}$$

$$\pi_3 = \frac{p^3}{1-(1-p)^3}$$

9 where  $p$  is the probability for one seed to be formed, to be estimated. Following the definition of

10 multinomial distributions, a maximum likelihood (ML) estimator of  $p$  is obtained by maximizing

$$\log L(p) = \log \left( \frac{x_{tot}!}{x_1! x_2! x_3!} \pi_1^{x_1} \pi_2^{x_2} \pi_3^{x_3} \right)$$

$$\log L(p) = \log \left( \frac{x_{tot}!}{x_1! x_2! x_3!} \right) + x_1 \log(\pi_1) + x_2 \log(\pi_2) + x_3 \log(\pi_3)$$

$$\log L(p) = \log(K) + x_1 \log \left( \frac{3p(1-p)^2}{1-(1-p)^3} \right) + x_2 \log \left( \frac{3p^2(1-p)}{1-(1-p)^3} \right) + x_3 \log \left( \frac{p^3}{1-(1-p)^3} \right)$$

$$\log L(p) = \log(K') + (x_1 + 2x_2 + 3x_3) \log(p) + (2x_1 + x_2) \log(1-p) - x_{tot} \log(1-(1-p)^3)$$

11 The ML estimator can thus be found by solving

$$\frac{\partial \log L(p)}{\partial p} = \frac{(x_1 + 2x_2 + 3x_3)}{p} - \frac{(2x_1 + x_2)}{1-p} - \frac{3x_{tot}(1-p)^2}{1-(1-p)^3} = 0$$

12 And with  $q = (1-p)$ ,

$$(x_1 + 2x_2 + 3x_3)q(1-q^3) + (2x_1 + x_2)p(1-q^3) - 3x_{tot}pq^3 = 0$$

1 which becomes after several simplifications

$$(x_1 + 2x_2 + 3x_3)(1 + q + q^2) = 3x_{tot}$$

2 The only positive solution of this second order polynomial equation is

$$\hat{q} = \sqrt{3 \frac{x_{tot}}{x_1 + 2x_2 + 3x_3} - \frac{3}{4} - \frac{1}{2}}$$

3 or

$$\hat{p} = \frac{3}{2} - \sqrt{3 \frac{x_{tot}}{x_1 + 2x_2 + 3x_3} - \frac{3}{4}}$$

4

5
